## Announcement

---

---

### C.E. Alken Prize

C.E. Alken Foundation Council  
Bern, January 2002

The C.E. Alken Foundation supports clinical and experimental research through an annual prize for outstanding scientific work.

The C.E. Alken Prize is awarded for the best unpublished scientific work in the field of urology and may be divided. The prize comprises a certificate and the sum of CHF 10,000.

Manuscripts can be submitted in either English or German. Seven copies of the manuscript should be sent to the following address and marked for the attention of:

Mr. E. Hauser, Advocate  
C.E. Alken Foundation  
Dr. F. Kellerhals and Partner  
Marktgasse 55  
CH-3011 Bern (Switzerland)

The deadline for submission of manuscripts is September 1, 2002. Each paper has to be marked with a code word and must not include the name of the author. An additional sealed envelope (marked on the outside with the code word) has to be enclosed and must contain the following:

- Curriculum vitae of the author (max. 3 pages).
- Structured summary of the manuscript (aim of study, material/methods, results, conclusions).

The award winner will be determined by the Foundation Council, whose decision is final.

## Announcement

---

---

### Erwin Fertig Prize for Urological Oncology

The Faculty of Medicine of the Justus-Liebig-Universität in Giessen invites applications for the Erwin Fertig Prize in Urological Oncology, 2002: The prize money is 5,000 EUR.

The prize is awarded for outstanding scientific achievements in the field of urological oncology. It is intended to support scientists with exceptional achievements in this specialized field of medicine which can be expected to have an impact on clinical practice. Original papers in German or English published or accepted for publication in 2001 and 2002 may be submitted.

Deadline for submission: October 1, 2002

Applications:

Herrn Prof. Dr. A. Schulz  
Dekan des Fachbereichs Medizin der Justus-Liebig-Universität Giessen  
Rudolf-Buchheim-Strasse 6  
D-35392 Giessen (Germany)
